# Supplementary material
Source: publisher site journal article supplement (https://www.dovepress.com/article/260226)
Supplement: Supplementary file 1 [file get_supplementary_file.php]

**Supplementary Table 1. Ocular trauma malpractice cases by year, state, method of resolution, and monetary award.**

| **Case** | **Year** | **State** | **Court** | **Means of Resolution** | **Verdict** | **Award or Indemnity** | **Award Adjustment to 2015 USD** | **Intervention or Legal Allegation** | **Diagnosis and Summary** |
| --- | --- | --- | --- | --- | --- | --- | --- | --- | --- |
| 1 | 1967 | GA | State Appeals | Appellate Ruling | Defendant |  |  | noninterventional | **Intraocular foreign body.** The plaintiff alleged damages secondary to failure to diagnose full-thickness corneal laceration with retained intraocular foreign body. The patient was diagnosed with a corneal abrasion. |
| 2 | 1975 | NY | State Appeals | Appellate Ruling | Plaintiff |  |  | surgical/procedural | **Intraocular foreign body.*** Parent of minor plaintiff alleged that child suffered vision loss and enucleation following surgical removal of intraocular foreign body. The plaintiff alleged that the defendant had failed to obtain informed consent regarding the risks of the surgery. |
| 3 | 1983 | IN | Federal Appeals | Appellate Ruling | Plaintiff |  |  | noninterventional | **Vitreous hemorrhage.** The plaintiff, an inmate, sought damages for "deliberate indifference” to his visual complaints including delay in treatment of his vitreous hemorrhage and sickle cell disease. The defendants argued that he was seen often and treated appropriately. |
| 4 | 1984 | OR | State Appeals | Appellate Ruling | Plaintiff | $ 450,000.00 | $1,032,167.47 | noninterventional | **Intraocular foreign body.** The plaintiff alleged that the defendant was unable to preserve useable vision after the plaintiff accidentally discharged a shotgun propelling birdshot into his eye. |
| 5 | 1985 | MA | State Supreme | Appellate Ruling | Defendant |  |  | medical | **Adverse drug effect.** The plaintiff alleged that he suffered bilateral aseptic necrosis of the femoral heads secondary to a long-term, high-dose regimen of oral prednisone following re-surgery for intraocular foreign body. |
| 6 | 1985 | TX | State Appeals | Appellate Ruling | Plaintiff |  |  | surgical/procedural | **Intraocular foreign body.** The plaintiff alleged that his endophthalmitis and enucleation could have been prevented. He was injured with an intraocular metal splinter, which was partially repaired on the day of the event; however, the defendant left the metal splinter in the eye and referred to another ophthalmologist who performed a re-operation the following day. When the patient was seen by the second ophthalmologist, he had endophthalmitis necessitating enucleation. |
| 7 | 1985 | MD | State District | Settlement | Plaintiff | $ 130,000.00 | $ 287,928.25 | noninterventional | **Corneal laceration.** Plaintiff alleged loss of vision after developing endophthalmitis when she was struck in the eye with a dental prosthesis. She was incorrectly diagnosed with corneal abrasion. |
| 8 | 1986 | MI | State Appeals | Appellate Ruling | Defendant |  |  | noninterventional | **Orbital cellulitis.** The plaintiff suffered injuries to right eye and right side of head following a car accident. The patient's eye injury was misdiagnosed as retrobulbar hemorrhage, and as a result of the late treatment for what was actually orbital cellulitis, she lost vision in the right eye. |
| 9 | 1990 | MA | State District | Jury Verdict | Plaintiff | $ 531,000.00 | $ 968,215.73 | noninterventional | **Intraocular foreign body.*** The parents of minor child alleged that delay in diagnosis of intraocular foreign body led to endophthalmitis and enucleation. The child was misdiagnosed initially with corneal abrasion. |
| 10 | 1991 | NJ | State Appeals | Appellate Ruling | Plaintiff |  |  | noninterventional | **Foreign body in sinus.** The plaintiff alleged that defendant ophthalmologists should have ordered imaging on the plaintiff following penetration of a pen into the maxillary sinus. The plaintiff alleged that the tip of the pen remained in his sinus and caused pain and suffering for twelve years before it was detected. |
| 11 | 1991 | NY | State District | Jury Verdict | Defendant |  |  | surgical/procedural | **Corneal laceration.*** The parents of plaintiff alleged that the patient lost vision and developed glaucoma after being struck in the eye with a monopoly board. The defendant ophthalmologist was alleged to have failed to completely remove iris incarceration from the corneal wound and failed to render appropriate post-operative care and treatment. It was undisputed that the child did not present for several days after the injury. |
| 12 | 1991 | IL | Federal District | Summary Judgment | Defendant |  |  | surgical/procedural | **Intraocular foreign body.** The plaintiff alleged that he had continued pain following surgery to remove an intraocular foreign body, which he alleged left part of the foreign body in the eye. |
| 13 | 1992 | PA | State District | Jury Verdict | Defendant |  |  | noninterventional | **Intraocular foreign body.*** The guardian of a minor child alleged that the defendant ophthalmologists negligently failed to diagnose intraocular organic material following a tree branch injury to the eye resulting in blindness. |
| 14 | 1992 | FL | State District | Jury Verdict | Plaintiff | $ 425,000.00 | $ 721,912.33 | noninterventional | **Intraocular foreign body.** The plaintiff alleged that failure to culture eye following injury with retained intraocular foreign body resulted in misdiagnosis of infection as bacterial in nature when in reality it was fungal. The plaintiff alleged that he was treated with Maxitrol, which was contraindicated in fungal infection causing him to lose his eye. |
| 15 | 1992 | MA | State District | Settlement | Plaintiff | $ 240,000.00 | $ 407,668.14 | noninterventional | **Retinal detachment.*** The guardian of a minor child alleged that the child had been diagnosed with iritis following a traumatic ocular injury and had been told to follow-up in a year and allegedly did not undergo any additional "diagnostic tests". When the patient re-presented at six months with severe vision loss, he was diagnosed with a retinal detachment. |
| 16 | 1994 | MI | State District | Jury Verdict | Plaintiff | $ 25,000.00 | $ 40,201.75 | noninterventional | **Orbital fracture.** The plaintiff alleged that he lost vision after the defendant's failed to treat his traumatic optic neuropathy and increased intraocular pressure following a blow to the eye with a crowbar. |
| 17 | 1994 | MO | State District | Jury Verdict | Plaintiff | $ 400,000.00 | $ 643,228.07 | surgical/procedural | **Intraocular foreign body.*** The plaintiff, a minor at the time of injury, claimed that his enucleation could have been prevented. He alleged that the defendant should have referred the plaintiff to a retina specialist to perform a vitrectomy to remove intraocular rivet instead of using an electromagnet, which caused a retinal detachment. |
| 18 | 1995 | CA | State District | Jury Verdict | Plaintiff | $ 400,000.00 | $ 625,501.31 | surgical/procedural | **Orbital fracture.** The plaintiff alleged that blindness resulted from damage to the optic nerve during surgery to free the medial rectus from entrapment after an orbital fracture. |
| 19 | 1995 | PA | State District | Jury Verdict | Plaintiff | $ 570,000.00 | $ 891,339.37 | surgical/procedural | **Orbital fracture.*** The guardian of the minor male plaintiff alleged restriction of eye movement following surgery to release an extraocular muscle following orbital fracture. |
| 20 | 1997 | IL | State District | Jury Verdict | Defendant |  |  | noninterventional | **Referral.*** The guardian of a minor child alleged that the child suffered legal blindness due to the defendant's negligence in referring the patient to a specialist more quickly following traumatic injury. The defendant argued that she waited for the inflammation to improve before referring to a specialist to remove the patient's traumatic cataract and that early referral would not have changed the outcome. |
| 21 | 1997 | CA | State District | Jury Verdict | Plaintiff | $ 529,837.00 | $ 786,720.46 | noninterventional | **Open globe.*** The plaintiff, a minor at the time of injury, alleged that he lost his eye secondary to endophthalmitis after his open globe injury was not diagnosed by the emergency department physicians as well as by the defendant ophthalmologist and that earlier detection could have resulted in an improved outcome. |
| 22 | 1998 | NY | State Appeals | Appellate Ruling | Plaintiff |  |  | noninterventional | **Referral.*** The parent of minor child alleged that the defendant ophthalmologist was negligent because he did not personally examine a patient in the emergency department. The defendant offered informal advice to the emergency department attending and the ophthalmologist gave him clear instructions for treating and referring the patient. The defendant alleged that he did not have a relationship with the patient. The defendant filed a motion to dismiss, which was denied. After this, he appealed that decision and the original decision was upheld. The nature of the injury is unclear, only that it involved a fishing injury to the eye. |
| 23 | 2000 | FL | State District | Jury Verdict | Defendant |  |  | noninterventional | **Intracerebral hemorrhage.** The plaintiff's estate alleged that the defendant should have sent the plaintiff to the emergency room in the setting of suspected brain bleed and that failure to do so resulted in the patient's death. |
| 24 | 2000 | CA | State District | Jury Verdict | Plaintiff | $ 651,893.00 | $ 902,186.60 | surgical/procedural | **Intraocular foreign body.** The plaintiff alleged that the defendant was unqualified to perform a vitrectomy and allegedly performed an incomplete repair resulting in loss of vision. |
| 25 | 2000 | CA | State District | Settlement | Defendant |  |  | noninterventional | **Intraocular foreign body.** The plaintiff alleged loss of vision secondary to failure to promptly operate on open globe resulting in destruction of the retina, iris, and lens. |
| 26 | 2000 | NY | State District | Summary Judgment | Defendant |  |  | noninterventional | **Open globe.** The plaintiff alleged blindness secondary to the defendant ophthalmologist's negligence in his recommendations to a physicians' assistant regarding a patient with an open globe injury. The defendant never saw the patient, but gave recommendations that were not consistent with the standard of care. |
| 27 | 2002 | PA | State District | Jury Verdict | Defendant |  |  | noninterventional | **Endophthalmitis.** The plaintiff presented two days following an ocular injury with a wire. At that time he was diagnosed with a penetrating injury, endophthalmitis, and traumatic iritis requiring topical, intraocular, and intravenous antibiotics and a hospital stay. The plaintiff alleged that he was not treated in a timely manner, not anesthetized prior to intravitreal injection, and was not informed about follow-up schedule. |
| 28 | 2003 | WA | State District | Jury Verdict | Defendant |  |  | surgical/procedural | **Retained surgical material.** The plaintiff alleged that defendants had left a piece of gauze in the orbit during orbital reconstructive surgery seventeen years earlier that caused years of "pain and suffering". The defendants denied these claims. |
| 29 | 2005 | NC | State Appeals | Appellate Ruling | Defendant |  |  | noninterventional | **Intraocular foreign body.** The plaintiff alleged that he suffered loss of his eye after a lawn mower accident secondary to negligence on the part of the defendant who allegedly saw no intraocular foreign body on imaging and sutured the plaintiff's "star-like" laceration. The plaintiff was later found to have an intraocular foreign body, which ultimately resulted in the need for enucleation. |
| 30 | 2005 | KS | Federal Appeals | Appellate Ruling | Defendant |  |  | surgical/procedural | **Intraocular foreign body.** The plaintiff, an inmate, alleged that the defendants demonstrated "deliberate indifference" in the treatment of the patient's eye injury from retained bullet fragments in the eye. The plaintiff alleged that the incorrect eye was operated on, which caused development of scar tissue in his good eye resulting in loss of vision. He also claimed that he was not made aware the extent of damage to his eye. |
| 31 | 2005 | NY | State Appeals | Appellate Ruling | Defendant |  |  | surgical/procedural | **Corneal laceration.*** The guardian of a minor child alleged that the child developed peripheral scarring of cornea, astigmatism, and amblyopia following surgery to repair lacerated cornea and, chiefly, failure to diagnose lacerated cornea in a timely fashion following traumatic accident before iris prolapsed. |
| 32 | 2005 | PA | Federal District | Pre-trial Motions | Defendant |  |  | noninterventional | **Orbital fracture.** The plaintiff, an inmate, alleged that the defendants were "deliberately indifferent" to his serious medical needs following injury to his eye and face after an altercation with another inmate that resulted in an orbital floor fracture. The defendants argued that extensive medical and surgical care was performed on the patient. The case was dismissed. |
| 33 | 2005 | CA | State District | Settlement | Plaintiff | $ 250,000.00 | $ 305,064.00 | noninterventional | **Endophthalmitis.** The plaintiff alleged that he was not properly examined after being hit in the eye with a date palm frond and there was a delay in noting an intraocular foreign body which resulted in endophthalmitis and blindness. |
| 34 | 2006 | MI | State District | Jury Verdict | Plaintiff | $ 125,000.00 | $ 147,765.38 | noninterventional | **Endophthalmitis.*** The guardian of a minor male alleged that the child suffered from blindness due to the failure to diagnose and treat endophthalmitis following an open globe injury. The defendants alleged that the globe was not open. |
| 35 | 2006 | NJ | Federal District | Summary Judgment | Defendant |  |  | noninterventional | **Floaters.** The plaintiff, an inmate, who had a history of old optic neuritis, had an altercation with prison staff resulting in injury. He developed vitreous floaters after the incident. He alleged that the defendants acted "with deliberate indifference" to his conditions; however, the defendants argued that there was no treatment for his old optic neuritis or his stable appearing floaters. |
| 36 | 2006 | KY | Federal District | Summary Judgment | Defendant |  |  | medical | **Hypotony.** The plaintiff alleged that he suffered blindness and enucleation following development of hypotony in his eye after being left on "eye drops" for too long while an inmate following a traumatic ocular injury. |
| 37 | 2007 | IL | State District | Jury Verdict | Defendant |  |  | surgical/procedural | **Orbital fracture.*** The minor plaintiff alleged that she suffered visual impairment and facial disfigurement after the defendants allegedly misplaced a titanium plate in the plaintiff's face during orbital fracture repair. |
| 38 | 2007 | NY | State District | Pre-trial Motions | Plaintiff |  |  | surgical/procedural | **Corneal perforation.** Plaintiff alleged that he suffered visual impairment (BCVA 20/40) following corneal perforation from an exposed stitch after repair of a lower eyelid laceration. |
| 39 | 2008 | LA | Federal District | Post-trial relief | Defendant |  |  | noninterventional | **Open globe.** Plaintiff alleged that his open globe injury was not properly stabilized and was not treated with antibiotics before transfer to another hospital resulting delay of surgery during which time he developed endophthalmitis requiring enucleation. |
| 40 | 2008 | TX | Federal District | Summary Judgment | Defendant |  |  | noninterventional | **Orbital fracture.** The plaintiff, an inmate, alleged that he was denied surgical intervention following orbital ring fracture sustained during an altercation with another inmate and that this denial of surgery led to "mental anguish". The defendants argued that the fracture was healing without the need for surgical intervention. |
| 41 | 2009 | MS | State Appeals | Appellate Ruling | Defendant |  |  | noninterventional | **Open globe.** Plaintiff alleged that his physicians failed to order appropriate imaging to search for intraocular foreign bodies in the emergency department and alleged that the attending physician's failure to examine him in the emergency department at the time of injury resulted in a delay of treatment that ultimately resulted in vision loss secondary to retinal detachment during a later operation to remove intraocular glass pieces. |
| 42 | 2009 | NY | State District | Jury Verdict | Defendant |  |  | surgical/procedural | **Corneal laceration.** Plaintiff alleged loss of vision secondary to hypotony and endophthalmitis after all sutures from the plaintiff's corneal laceration repair were removed six weeks following full thickness corneal laceration after a metal object penetrated his safety goggles. The plaintiff allegedly called the office multiple times complaining of decreased vision, but was told he did not need to be seen. |
| 43 | 2012 | TX | State District | Jury Verdict | Defendant |  |  | noninterventional | **Orbital fracture.*** The plaintiff who was a minor at the time of the injury alleged that he developed limitation of elevation and depression of his right eye as well as diplopia after the defendant failed to treat an orbital fracture; however, the defendant was found to have acted within the standard of care. |
| 44 | 2013 | MS | Federal District | Pre-trial Motions | Plaintiff |  |  | noninterventional | **Corneal laceration.*** Mother of minor child alleged failure to promptly diagnose and surgically treat a full-thickness corneal laceration resulting in vision loss. The defendants' motion for summary judgment was denied based on expert testimony that suggested that the delay in treatment was excessive. |

* Indicates cases also discussed in 2016 analysis of malpractice in pediatric ophthalmology.

Engelhard SB, Collins M, Shah CT, et al. Malpractice litigation in pediatric ophthalmology. JAMA Ophthalmol. 2016;134(11):1230-1235.
